# Supplementary material for: Detemplation of soft mesoporous silica nanoparticles with structural preservation
Source: Royal Society of Chemistry journal article supplement (doi:10.1039/c3ta01240a), 2013-01-01
Supplement: c3ta01240a.pdf [file c3ta01240a.pdf]

# Detemplation of Soft Mesoporous Silica Nanoparticles with Structural Preservation

Lidia López Pérez, María J. Ortiz Iniesta, Zheng Zhang, Iker Agirrezabal-Telleria, Martijn Santes, Hero Jan Heeres and Ignacio Melián-Cabrera\*

Chemical Engineering Department, Institute of Technology & Management, University of Groningen  
Nijenborgh 4, 9747 AG Groningen, The Netherlands.

\* i.v.melian.cabrera@rug.nl

## Supplementary Information

**Table S-1.** Physico-chemical properties of water and *n*-butanol. <sup>a</sup>

| Solvent           | B.P. (°C) | Surface tensión, $\gamma$<br>(mN/m at 298 K) | Viscosity, $\mu$<br>(mPa·s) | Dielectric constant<br>(-) <sup>b</sup> |
|-------------------|-----------|----------------------------------------------|-----------------------------|-----------------------------------------|
| Water             | 100.0     | 71.95                                        | 0.890                       | 80.1                                    |
| <i>n</i> -Butanol | 118.2     | 24.93                                        | 2.540                       | 17.8                                    |

a) Information adapted from: “The CRC Handbook of Chemistry and Physics”, 92<sup>nd</sup> edition. CRC Press, 2011; b) Given as relative permittivity at 293.2 K.

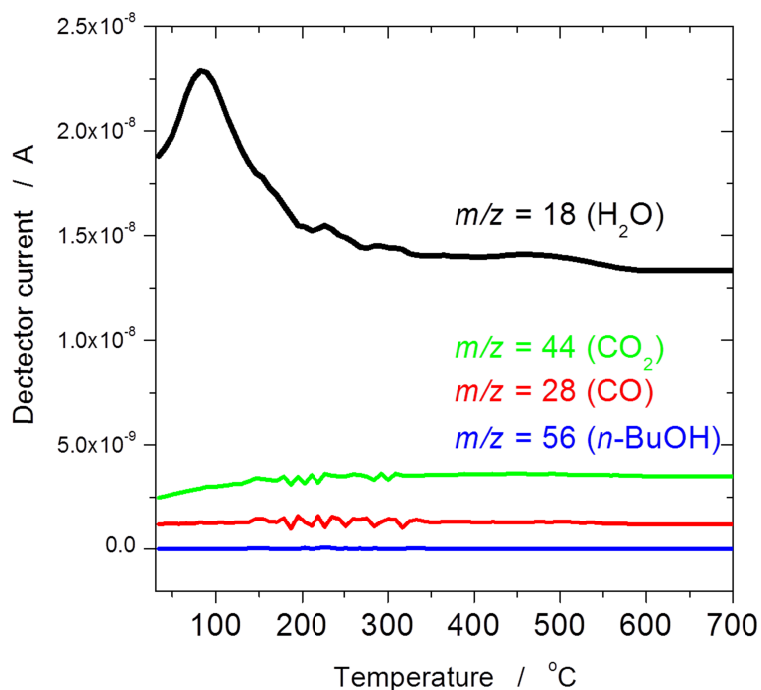

**Figure S-1.** EGA patterns of the Fenton detemplated sample dried in water; (sample **b** in Figure 1).

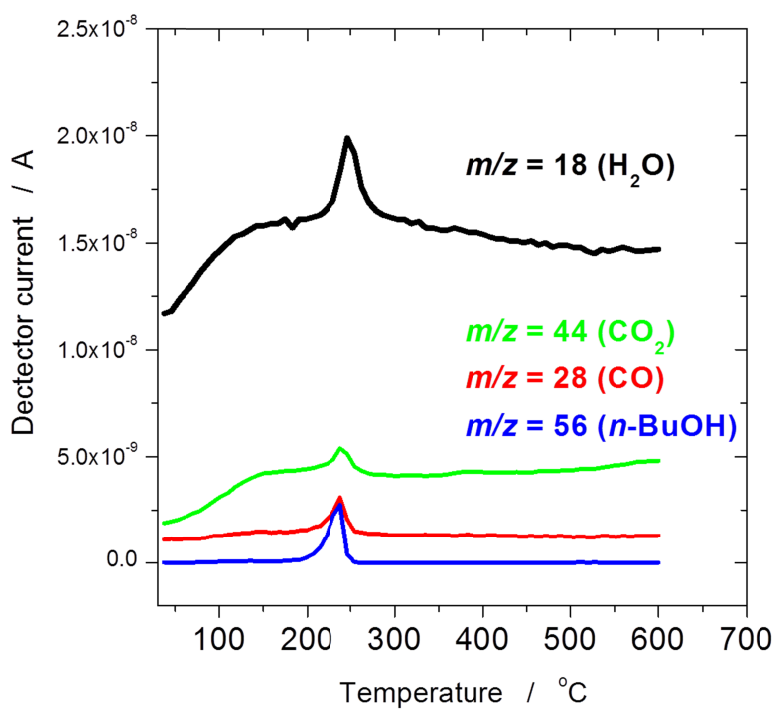

**Figure S-2.** EGA patterns of the Fenton detemplated sample exchanged and dried in *n*-BuOH; (sample **c** in Figure 1).

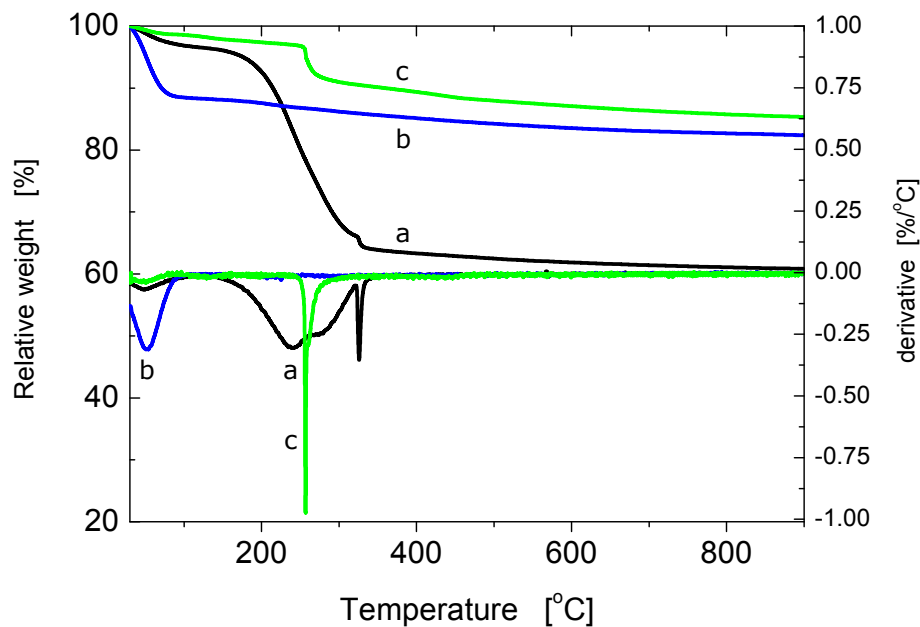

**Figure S-3.** Detemplation results of the hydrothermally aged material by thermogravimetric analyses: **a)** mesophase containing the template; **b)** Fenton detemplation (dried in the water-based reaction medium) and **c)** Fenton detemplation combined *n*-BuOH equilibration and drying.
